# Supplementary figures and images for: Cytoplasmic sharing through apical membrane remodeling
Source: eLife journal article supplement (doi:10.7554/elife.58107), 2020-10-14

**Figure 1-S1**

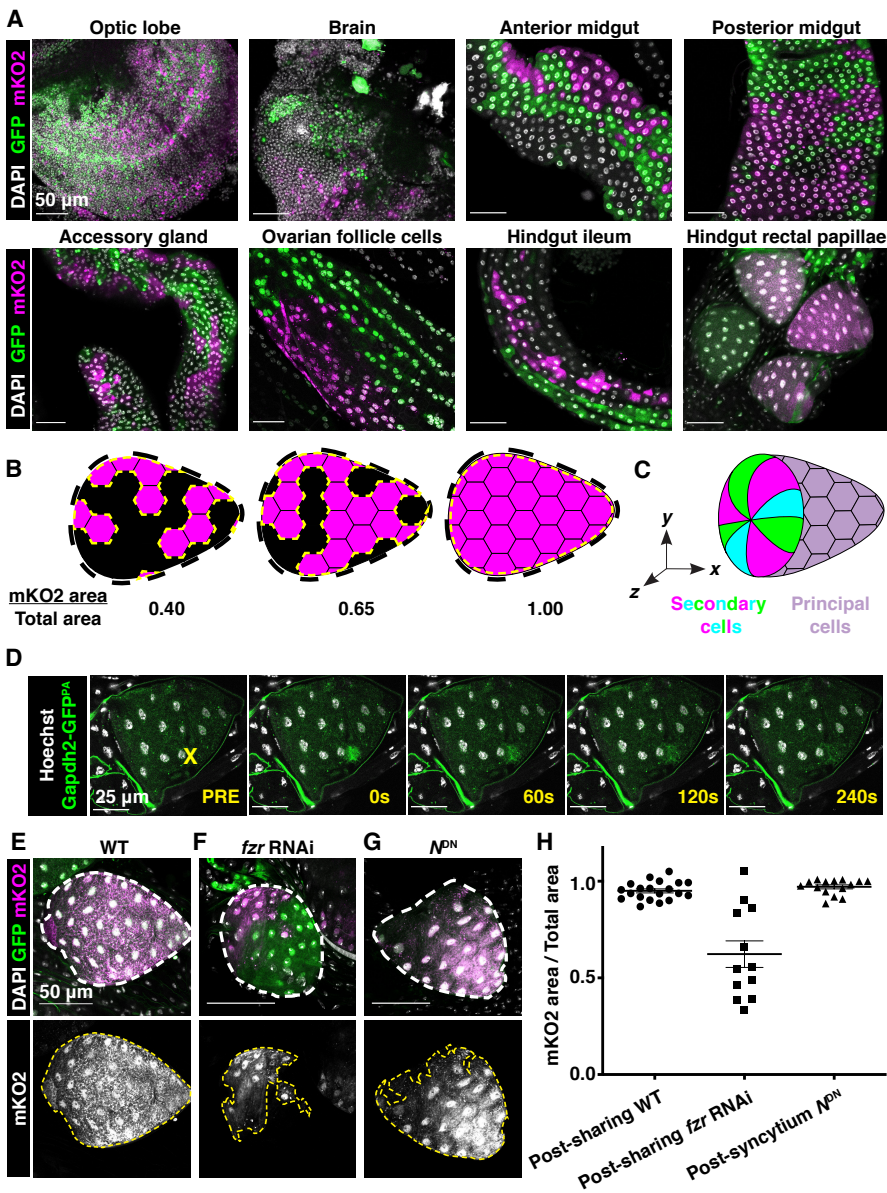

Supplement: supp [file elife_poa_e58107_Figure_1_figure_supplement_1.pdf › elife_poa_e58107_Figure_1_figure_supplement_1.pdf]

**Figure 2-S1**

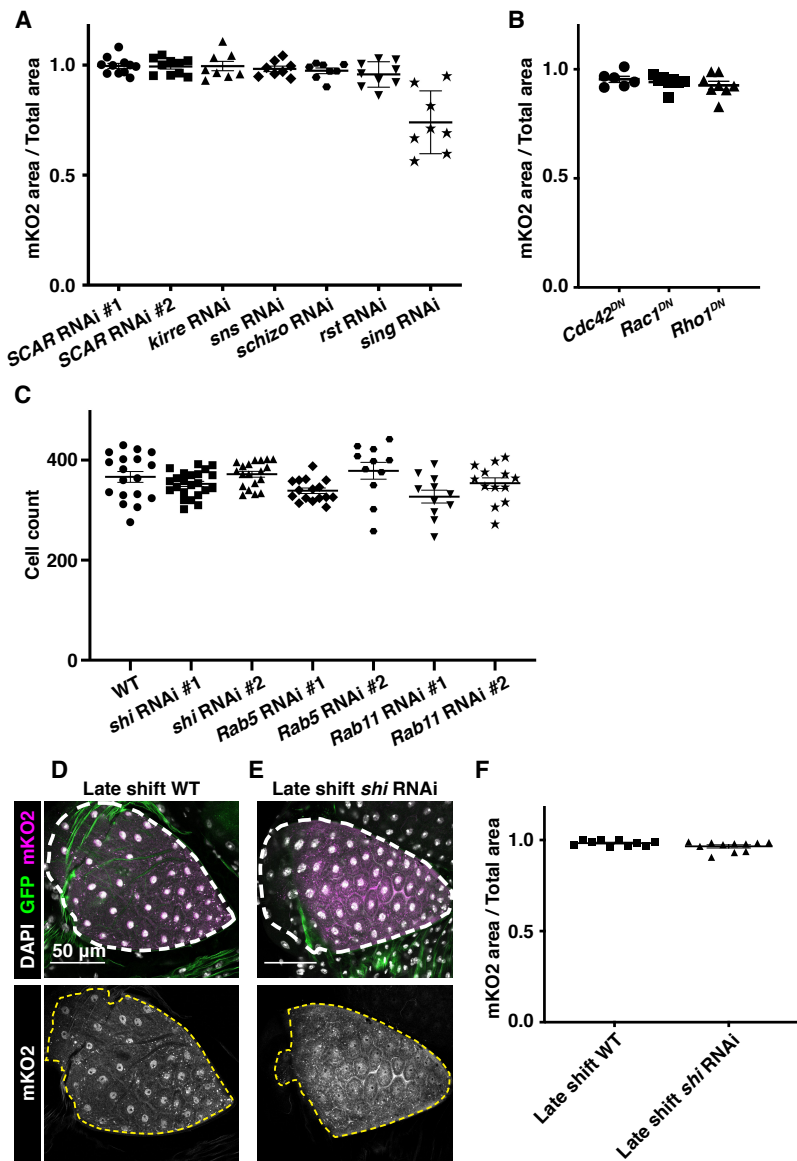

Supplement: supp [file elife_poa_e58107_Figure_2_figure_supplement_1.pdf › elife_poa_e58107_Figure_2_figure_supplement_1.pdf]

**Figure 3-S1**

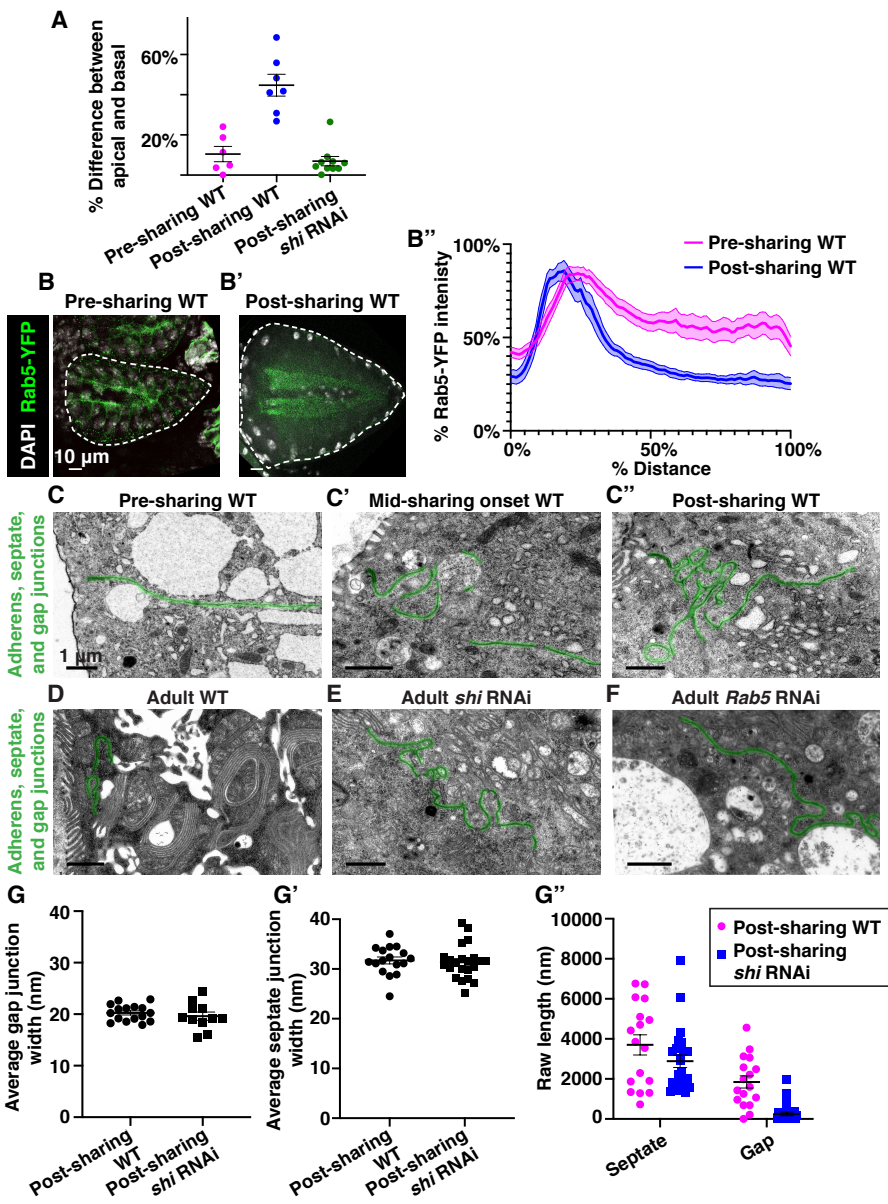

Supplement: supp [file elife_poa_e58107_Figure_3_figure_supplement_1.pdf › elife_poa_e58107_Figure_3_figure_supplement_1.pdf]

Figure 3-S2

A

Adult WT

Extracellular spaces

Adherens, septate, and gap junctions

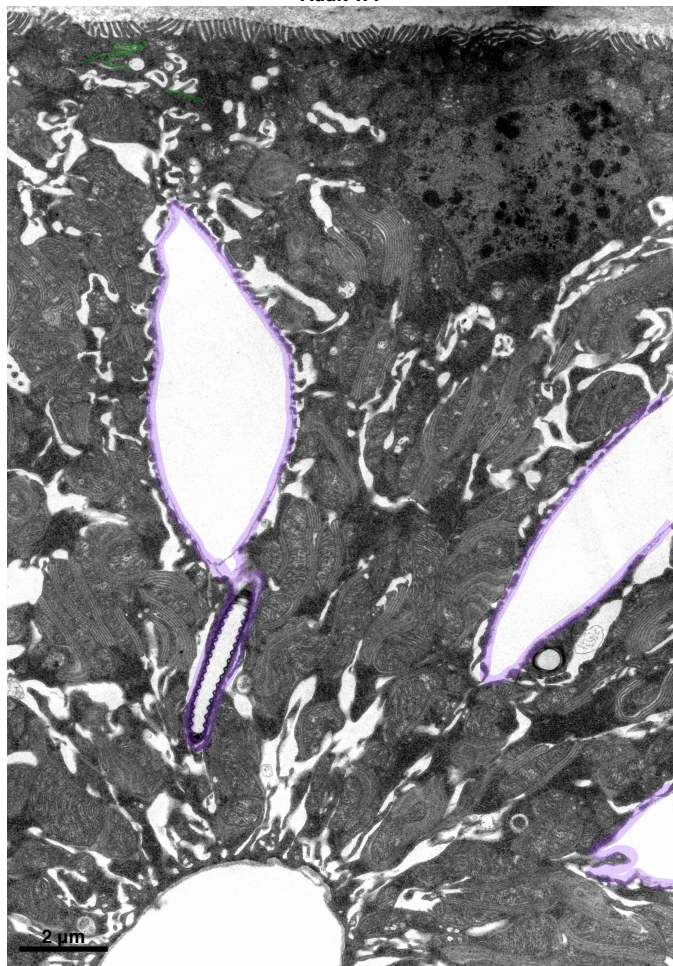

Supplement: supp [file elife_poa_e58107_Figure_3_figure_supplement_2.pdf › elife_poa_e58107_Figure_3_figure_supplement_2.pdf]

**Figure 4-S1**

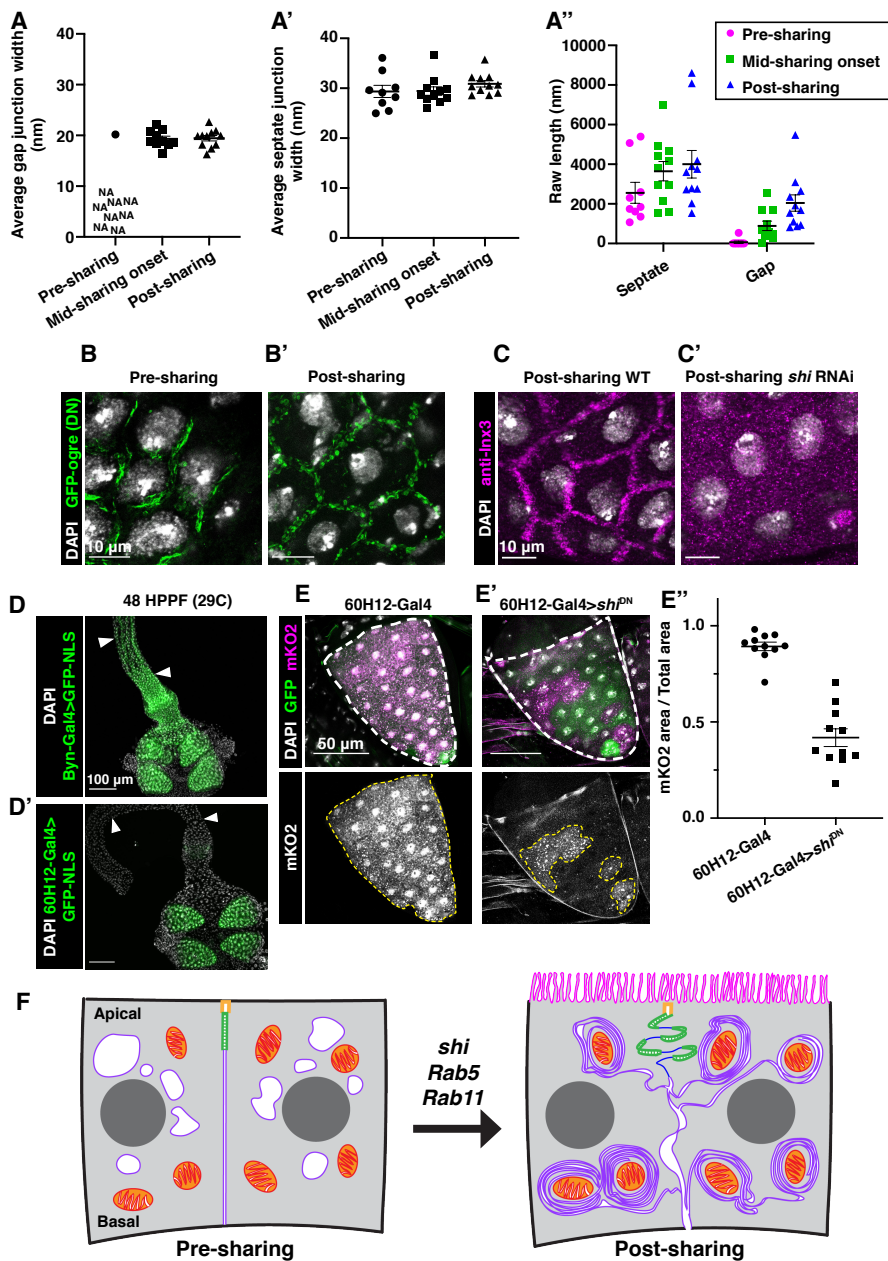

Supplement: supp [file elife_poa_e58107_Figure_4_figure_supplement_1.pdf › elife_poa_e58107_Figure_4_figure_supplement_1.pdf]
